# Supplementary material for: Electron-Level Mechanistic Insights into Ce Doping for Enhanced Efficiency Degradation of Bisphenol A under Visible Light Irradiation
Source: MDPI journal article supplement (doi:10.3390/nano12081382), 2022-04-18
Supplement: s1 [file s1]

## Supplementary Materials

# Electron-Level Mechanistic Insights into Ce Doping for Enhanced Efficiency Degradation of Bisphenol A under Visible Light Irradiation

Qi Zeng <sup>†</sup>, Chu-Ya Wang <sup>\*,†</sup>, Bo-Xing Xu, Jianyu Han, Xin Fang and Guangcan Zhu <sup>\*</sup>

School of Energy and Environment, Southeast University, Nanjing 210096, China;  
zeng\_qi@seu.edu.cn (Q.Z.); 213190216@seu.edu.cn (B.-X.X.); hanjy@seu.edu.cn (J.H.);  
fxin@seu.edu.cn (X.F.)

\* Correspondence: wang-cy@seu.edu.cn (C.-Y.W.); gc-zhu@seu.edu.cn (G.Z.); Tel.: +86-17775346164 (C.-Y.W.); +86-18912966396 (G.Z.)

† These authors contributed equally to this work.

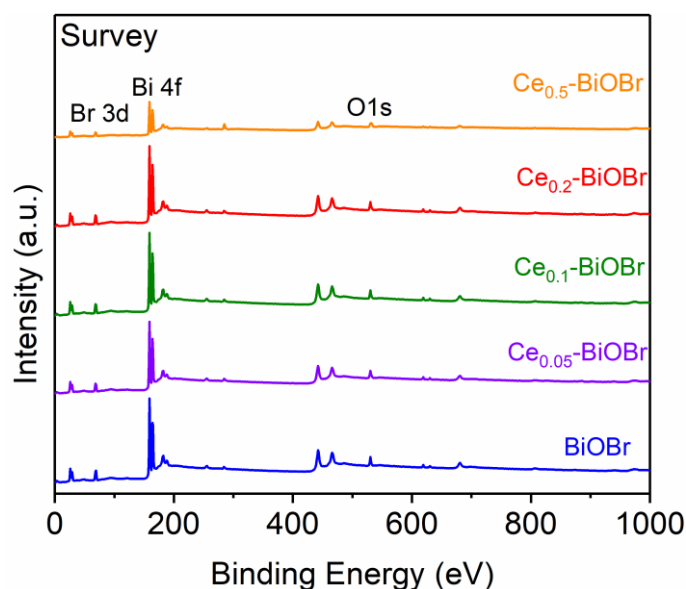

**Figure. S1.** XPS survey spectra of BiOBr and Ce-BiOBr samples.

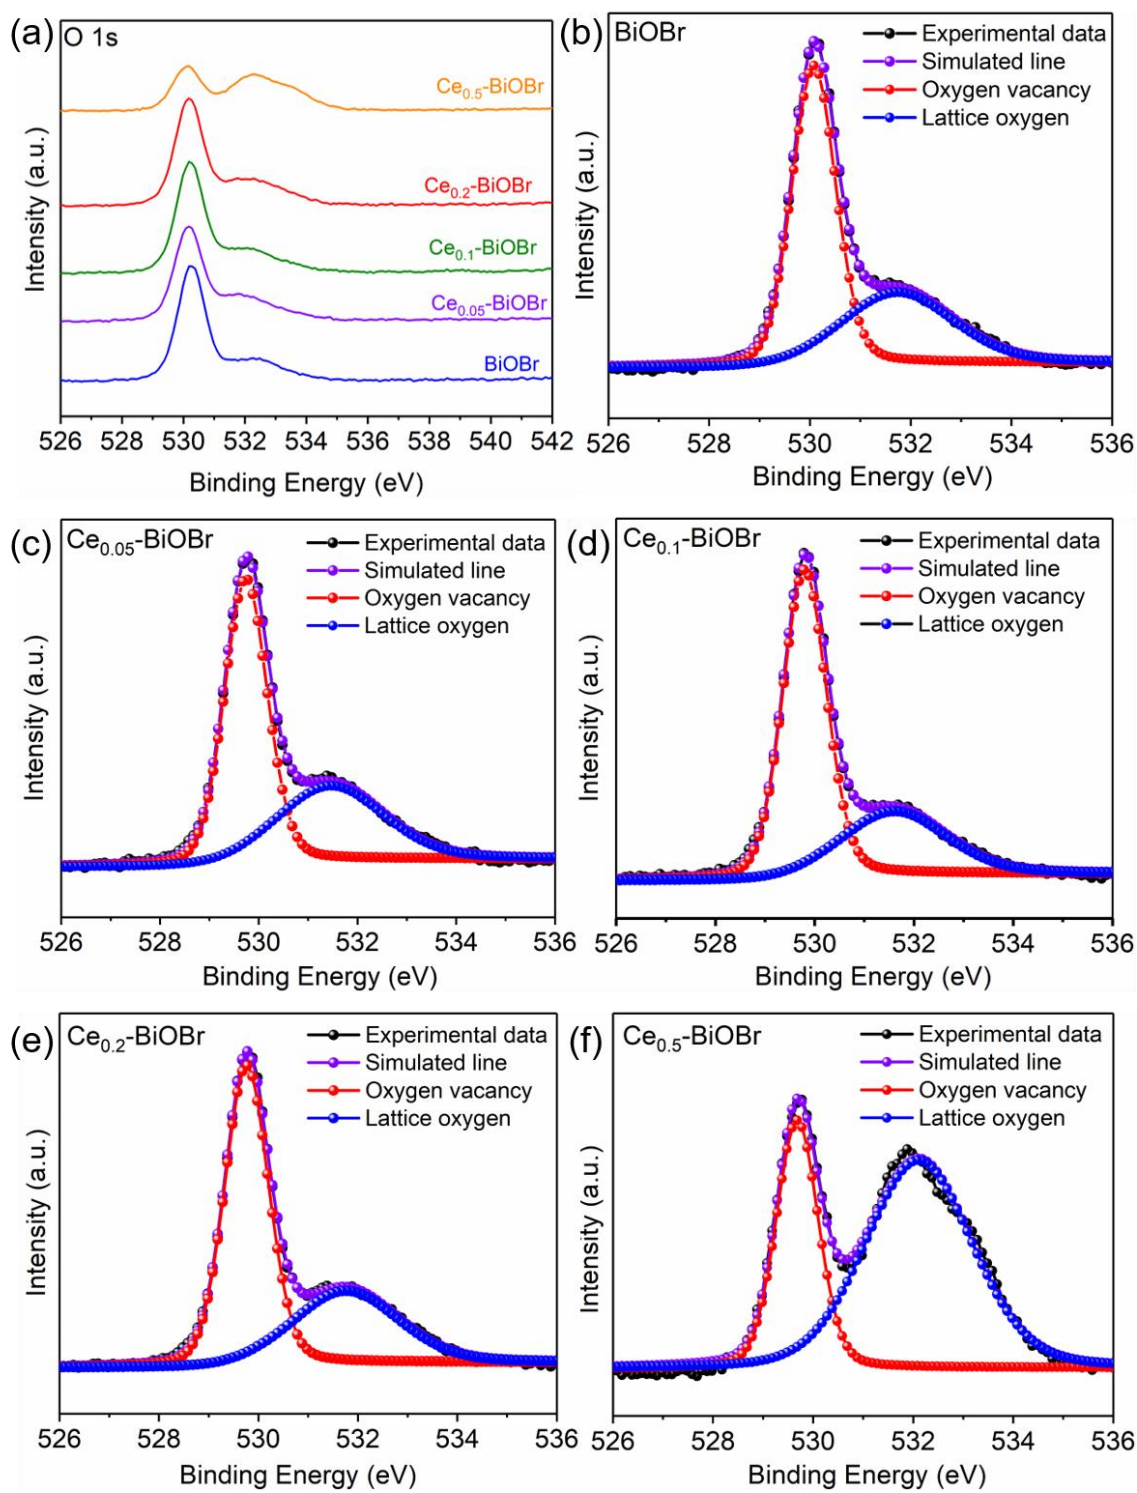

**Figure. S2.** O 1s XPS spectra of the (a) all samples, (b)  $\text{BiOBr}$ , (c)  $\text{Ce}_{0.05}\text{-BiOBr}$ , (d)  $\text{Ce}_{0.1}\text{-BiOBr}$ , (e)  $\text{Ce}_{0.2}\text{-BiOBr}$  and (f)  $\text{Ce}_{0.5}\text{-BiOBr}$ .

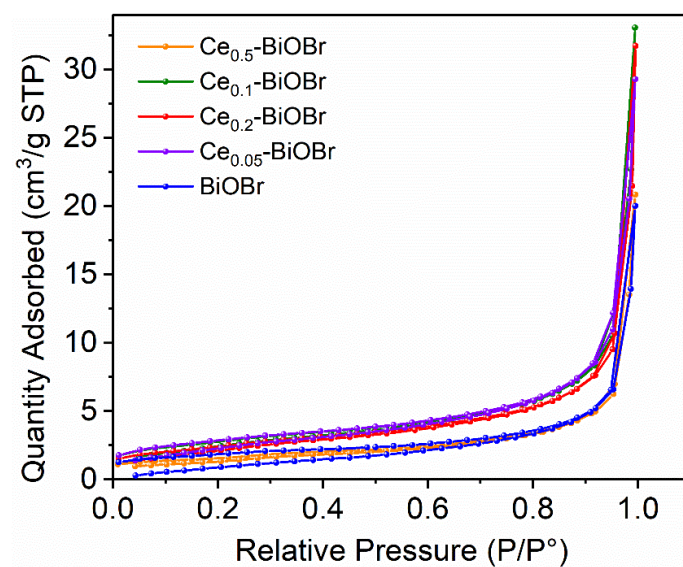

**Figure. S3.** N<sub>2</sub> adsorption-desorption isotherms of BiOBr and Ce-BiOBr samples.

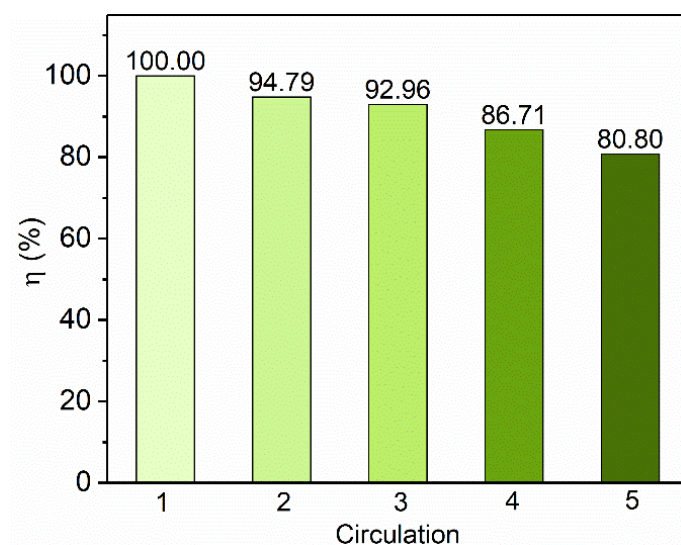

**Figure. S4.** Recycling properties of the photocatalytic degradation of BPA over Ce<sub>0.2</sub>-BiOBr nanosheets.

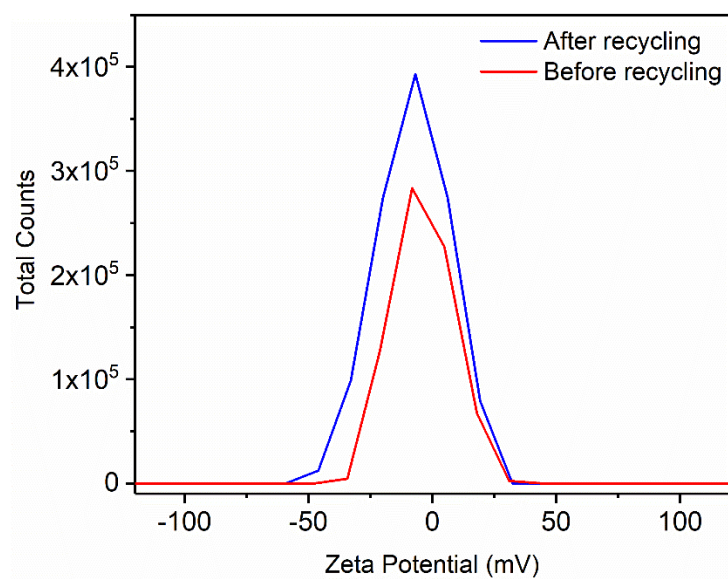

**Figure. S5.** Zeta potential distribution of Ce<sub>0.2</sub>-BiOBr before and after five cycles of BPA degradation.

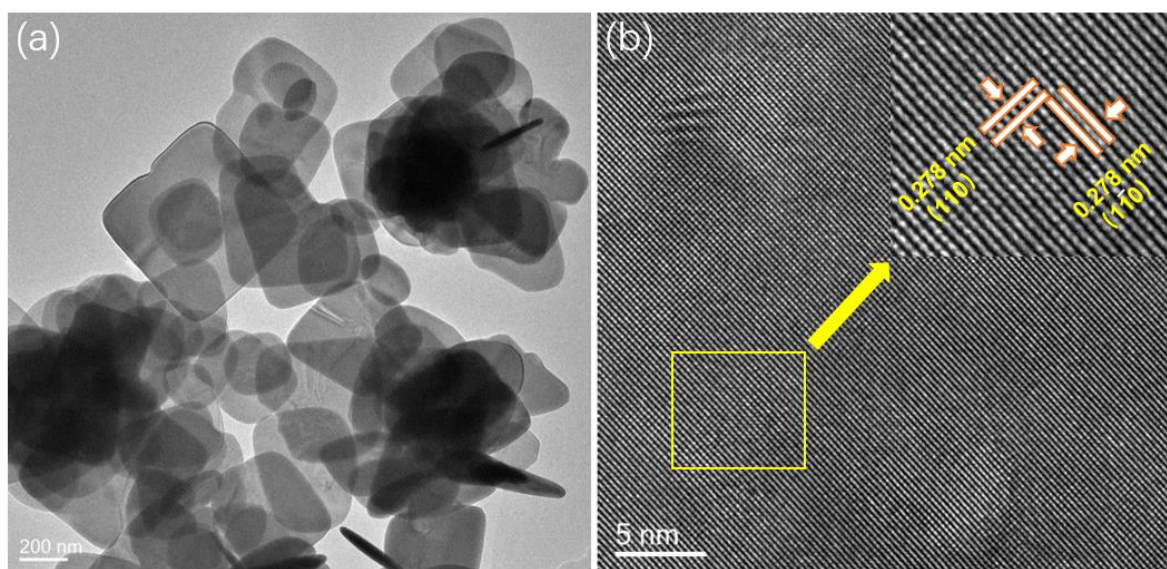

**Figure. S6.** (a) TEM and (b) HRTEM images of  $\text{Ce}_{0.2}\text{-BiOBr}$  after five cycles of BPA degradation.

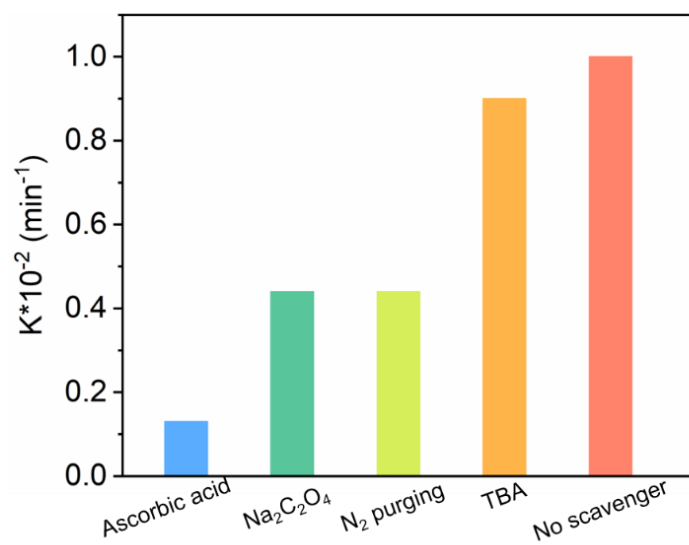

**Figure. S7.** Photocatalytic degradation kinetic constants of BPA with added scavengers.



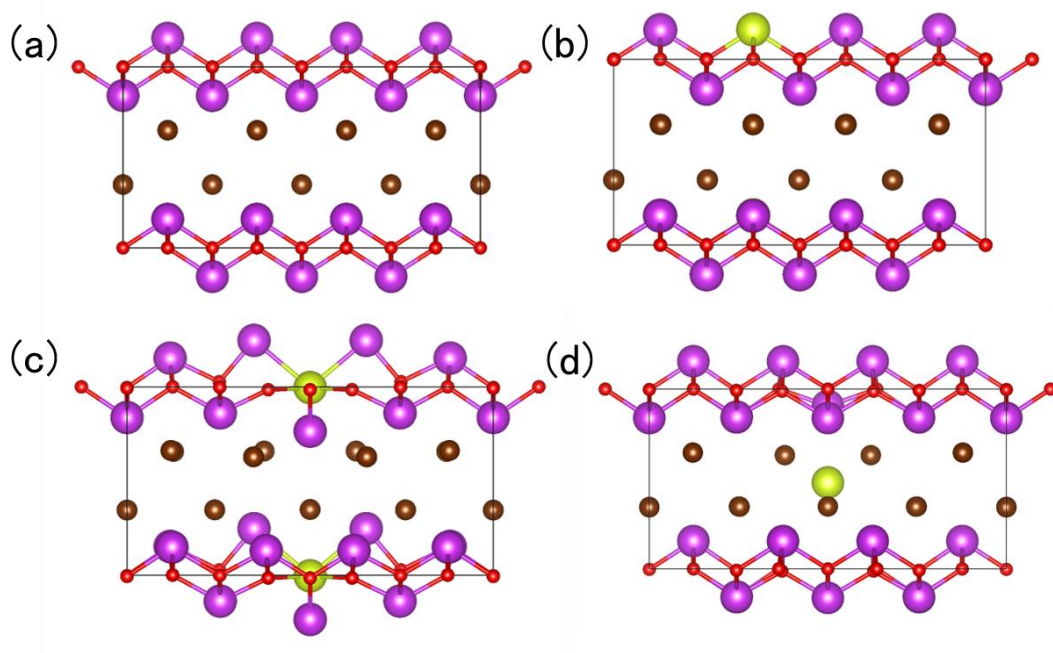

**Figure. S8.** (a) Optimized structure of BiOBr, Ce doping on (b) Bi sites and (c) O sites and (d) Br sites.



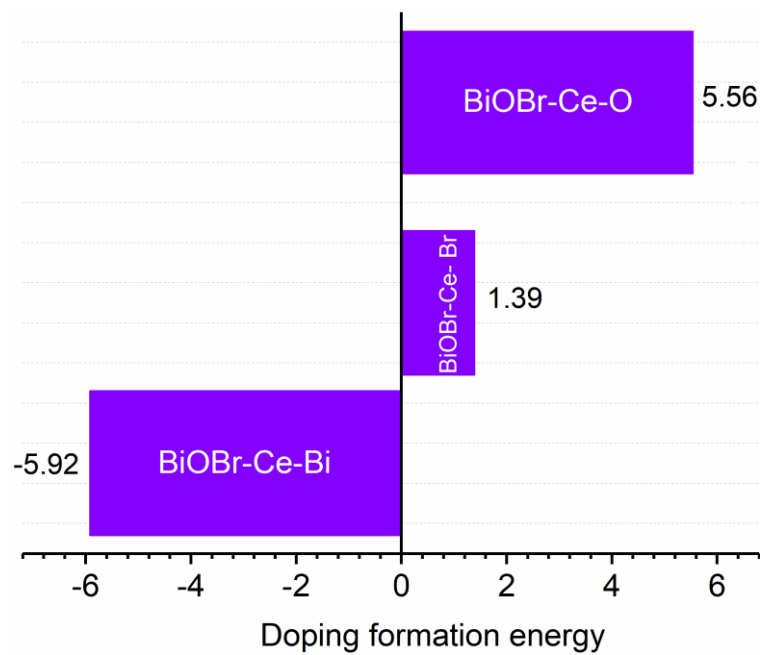

**Figure. S9.** The formation energies of Ce atoms in Bi, Br, O sites, respectively.

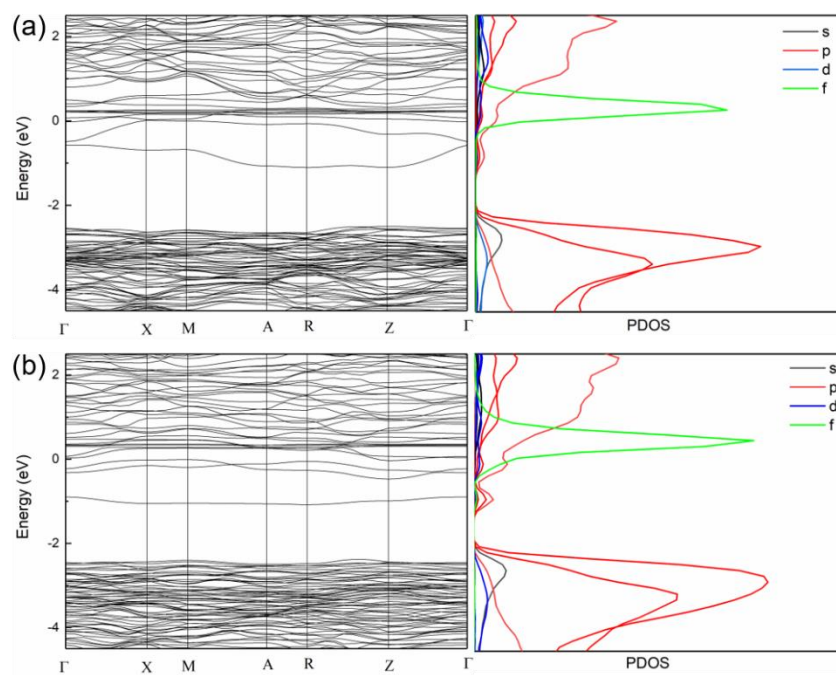

**Figure. S10.** Electron band structure and state density diagram of Ce atoms in (a) Br and (b) O sites.

**Table. S1.** BET surface areas, pore volume and pore size of Ce<sub>0.2</sub>-BiOBr before and after five cycles of BPA degradation.

|                         | <b>S<sub>BET</sub> (m<sup>2</sup>·g<sup>-1</sup>)</b> | <b>V<sub>pore</sub> (cm<sup>3</sup>·g<sup>-1</sup>)</b> | <b>D<sub>pore</sub> (nm)</b> |
|-------------------------|-------------------------------------------------------|---------------------------------------------------------|------------------------------|
| <b>Before recycling</b> | 8.55                                                  | 0.049                                                   | 22.94                        |
| <b>After recycling</b>  | 8.31                                                  | 0.031                                                   | 14.75                        |
